# Supplementary material for: Population structure and diversity of Plasmodium falciparum in children with asymptomatic malaria living in different ecological zones of Ghana
Source: PubMed Central journal article supplement (PMC8120845; doi:10.1186/s12879-021-06120-9), 2021-05-13

Table s1: Primers used in the study

| Locus                                        | Primer sequence 5'-3'                | Probe    | Chromosome | SSR linked gene         | Annealing (°C) |
|----------------------------------------------|--------------------------------------|----------|------------|-------------------------|----------------|
| <b>Microsatellite analysis</b>               |                                      |          |            |                         |                |
| Poly $\alpha$ -R                             | ATCAGATAATTGTTGGTA                   |          | 4          | DNA Poly $\alpha$       | 42             |
| Poly $\alpha$ -F                             | AAAATATAGACGAACAGA                   |          |            |                         | 42             |
| Poly $\alpha$ -3(IR)                         | GAAATTATAACTTACCA                    | 6-FAM    |            |                         | 45             |
| PFPK2-3R                                     | CCTCAGACTGAAATGCAT                   |          | 12         | Protein Kinase          | 42             |
| PFPK2-F                                      | CTTTCATCGATACTACGA                   |          |            |                         | 42             |
| PFPK2-R                                      | AAAGAAGGAACAAGCAGA                   | HEX      |            |                         | 45             |
| TA81-3F                                      | GAAGAAATAAGGGAAGGT                   |          | 5          |                         | 42             |
| TA81-R                                       | TTTCACACAACACAGGATT                  |          |            |                         | 42             |
| TAA81-F                                      | TGGACAAATGGGAAAGGATA                 | Atto 565 |            |                         | 45             |
| ARA2-3(F)                                    | GTACATATGAATCACCAA                   |          | 11         | Asparagine Rich Protein | 42             |
| ARA2-R                                       | GCTTTGAGTATTATTAATA                  |          |            |                         | 42             |
| ARA2-F                                       | GAATAAACAAAGTATTGCT                  | 6-FAM    |            |                         | 45             |
| TA87-3F                                      | ATGGGTAAATGAGGTACA                   |          | 6          |                         | 42             |
| TA87-R                                       | ACATGTTTCATATTACTCAC                 |          |            |                         | 42             |
| TA87-F                                       | AATGGCAACACCATTCAAC                  | HEX      |            |                         | 45             |
| TA40 Rev-1                                   | GAAATTGGCACCACCACA                   |          | 10         |                         | 42             |
| TA40 For                                     | AAGGGATTGCTGCAAGGT                   |          |            |                         | 42             |
| TA40 Rev-2                                   | CATCAATAAAATCACTACTA                 | Atto 565 |            |                         | 45             |
| <b>18S rRNA gene of <i>P. falciparum</i></b> |                                      |          |            |                         |                |
| rPLU6                                        | 5'TTAAAATTGTTGCAGTTAAAACG3'          |          |            |                         |                |
| rPLU5                                        | 5'CYTGTGTTGCCTTAAACTTC3'             |          |            |                         | 55             |
| rFAL1                                        | 5'TTAAACTGGTTTGGGAAAACCAAATATATT-3'  |          |            |                         |                |
| rFAL2                                        | 5'-ACACAATAGACTCAATCATGACTACCCGTC-3' |          |            |                         | 58             |

Table S2. Microsatellite analysis

## 2a. Genetic diversity

| Site                | Loci   | N  | Na   | He    |
|---------------------|--------|----|------|-------|
| Ada rainy season    | Poly_a | 14 | 8.0  | 0.829 |
|                     | Pfpk2  | 18 | 5.0  | 0.568 |
|                     | TAA81  | 18 | 7.0  | 0.773 |
|                     | ARA2   | 16 | 3.0  | 0.227 |
|                     | TA87   | 19 | 7.0  | 0.709 |
|                     | TA40   | 16 | 4.0  | 0.547 |
| Konong rainy season | Poly_a | 19 | 11.0 | 0.784 |
|                     | Pfpk2  | 19 | 9.0  | 0.839 |
|                     | TAA81  | 18 | 11.0 | 0.877 |
|                     | ARA2   | 17 | 7.0  | 0.746 |
|                     | TA87   | 18 | 13.0 | 0.856 |
| Pagaza rainy season | TA40   | 19 | 4.0  | 0.620 |
|                     | Poly_a | 26 | 12.0 | 0.886 |
|                     | Pfpk2  | 25 | 14.0 | 0.776 |

|                          |        |    |      |       |
|--------------------------|--------|----|------|-------|
|                          | TAA81  | 27 | 10.0 | 0.818 |
|                          | ARA2   | 22 | 6.0  | 0.735 |
|                          | TA87   | 26 | 11.0 | 0.767 |
|                          | TA40   | 22 | 8.0  | 0.840 |
| <b>Ada dry season</b>    | Poly_a | 18 | 10.0 | 0.776 |
|                          | Pfpk2  | 18 | 4.0  | 0.338 |
|                          | TAA81  | 19 | 10.0 | 0.787 |
|                          | ARA2   | 19 | 2.0  | 0.188 |
|                          | TA87   | 19 | 10.0 | 0.812 |
|                          | TA40   | 18 | 8.0  | 0.762 |
| <b>Konong dry season</b> | Poly_a | 21 | 9.0  | 0.805 |
|                          | Pfpk2  | 10 | 6.0  | 0.710 |
|                          | TAA81  | 16 | 4.0  | 0.609 |
|                          | ARA2   | 17 | 8.0  | 0.708 |
|                          | TA87   | 20 | 5.0  | 0.600 |
|                          | TA40   | 13 | 4.0  | 0.725 |
| <b>Pagaza dry season</b> | Poly_a | 10 | 7.0  | 0.705 |
|                          | Pfpk2  | 6  | 4.0  | 0.514 |
|                          | TAA81  | 10 | 3.0  | 0.515 |
|                          | ARA2   | 9  | 2.0  | 0.444 |
|                          | TA87   | 10 | 3.0  | 0.585 |
|                          | TA40   | 6  | 3.0  | 0.611 |

2b. Complete Microsatellite data set

| Sample ID | Site/Season | Poly_a  | PFPK2   | TAA81       | ARA2  | TA87    | TA40    |
|-----------|-------------|---------|---------|-------------|-------|---------|---------|
| ADA 078   | Ada/Rainy   | 145,160 | 170     | 120         | 65,70 | 100     | 210     |
| ADA 113   | Ada/Rainy   | 0       | 150,165 | 120         | 65    | 65,95   | 210     |
| ADA 061   | Ada/Rainy   | 140,150 | 165     | 0           | 65    | 95      | 200,220 |
| ADA 110   | Ada/Rainy   | 148     | 160,165 | 130         | 65    | 90,95   | 215,220 |
| ADA 120   | Ada/Rainy   | 160     | 165     | 115,118     | 0     | 95,100  | 220     |
| ADA 114   | Ada/Rainy   | 135,140 | 160     | 120,125     | 65    | 60,95   | 220     |
| ADA 155   | Ada/Rainy   | 145,160 | 160,165 | 118,125     | 65    | 95,100  | 220     |
| ADA 153   | Ada/Rainy   | 145     | 165,170 | 122         | 0     | 100,110 | 220     |
| ADA 148   | Ada/Rainy   | 150,155 | 160     | 118         | 65    | 90,95   | 215     |
| ADA 126   | Ada/Rainy   | 140,148 | 165     | 120         | 0     | 100     | 220     |
| ADA 098   | Ada/Rainy   | 145,150 | 165,175 | 120,125     | 60    | 100,115 | 0       |
| ADA 009   | Ada/Rainy   | 145     | 0       | 120,135     | 65    | 100,115 | 0       |
| ADA 128   | Ada/Rainy   | 0       | 165,170 | 120,125     | 65,70 | 95,100  | 0       |
| ADA 098   | Ada/Rainy   | 0       | 165     | 118         | 65    | 100,115 | 210,220 |
| ADA 072   | Ada/Rainy   | 140     | 165,160 | 125,130,135 | 65    | 100,115 | 220     |
| ADA 077   | Ada/Rainy   | 160     | 165     | 120         | 65    | 95,100  | 215     |
| ADA 086   | Ada/Rainy   | 0       | 165,170 | 120,125     | 65    | 100,115 | 220     |
| ADA 068   | Ada/Rainy   | 0       | 165     | 118         | 65    | 100,115 | 220     |
| ADA 132   | Ada/Rainy   | 170     | 165     | 120,130     | 65    | 95,100  | 215,225 |
| ADA 085   | Ada/Dry     | 0       | 165     | 0           | 65    | 60,95   | 225,220 |
| ADA 066   | Ada/Dry     | 148,165 | 165     | 112,120     | 65    | 90,100  | 220     |
| ADA 070   | Ada/Dry     | 0       | 160,165 | 120,130     | 65    | 155,160 | 120,130 |
| ADA 090   | Ada/Dry     | 140,155 | 165     | 0           | 65    | 90,100  | 210,215 |
| ADA 113   | Ada/Dry     | 145,148 | 165     | 125,130     | 65    | 90      | 210     |
| ADA 095   | Ada/Dry     | 148,160 | 165     | 115,118     | 65    | 90,95   | 220     |
| ADA 106   | Ada/Dry     | 145,148 | 165     | 120,125     | 65    | 90,95   | 215     |
| ADA 031   | Ada/Dry     | 160,148 | 160,165 | 112,125     | 65    | 90,100  | 210,220 |
| ADA 059   | Ada/Dry     | 145,148 | 165     | 122,125     | 65    | 95      | 220     |

|         |               |             |                 |                 |          |             |             |
|---------|---------------|-------------|-----------------|-----------------|----------|-------------|-------------|
| ADA 063 | Ada/Dry       | 148,150     | 165             | 118,122         | 65       | 90,100      | 210,220     |
| ADA 105 | Ada/Dry       | 148         | 165             | 120             | 65       | 100,110     | 220         |
| ADA 116 | Ada/Dry       | 148,150     | 160,165         | 120,125         | 65       | 90,95       | 215         |
| ADA 119 | Ada/Dry       | 148         | 0               | 125,145         | 65       | 100         | 220         |
| ADA 112 | Ada/Dry       | 148         | 0               | 120,130         | 65       | 90,115      | 0           |
| ADA 100 | Ada/Dry       | 148,160     | 0               | 120             | 65       | 100,115     | 210,220     |
| ADA 086 | Ada/Dry       | 0           | 165             | 120             | 0        | 0           | 0           |
| ADA 088 | Ada/Dry       | 160         | 165             | 120             | 0        | 0           | 0           |
| ADA 095 | Ada/Dry       | 168         | 165             | 130             | 65       | 90          | 210         |
| ADA 119 | Ada/Dry       | 150         | 165             | 120             | 60       | 85          | 200         |
| ADA 120 | Ada/Dry       | 118         | 163             | 135             | 65       | 80          | 195         |
| ADA 105 | Ada/Dry       | 178         | 155             | 123             | 60       | 80          | 195         |
| KG 040  | Konongo/Rainy | 140,145,150 | 160             | 120,125,130     | 0        | 80,90,95    | 225         |
| KG 062  | Konongo/Rainy | 148,160     | 160,170,175,178 | 145,150,155,160 | 65,70,75 | 75,80,90    | 220         |
| KG 112  | Konongo/Rainy | 155         | 170             | 12              | 62       | 150,175,180 | 200         |
| KG 060  | Konongo/Rainy | 150         | 170             | 120             | 68       | 155         | 220         |
| KG 079  | Konongo/Rainy | 155         | 165,170         | 125,130,135     | 70       | 85,90       | 225         |
| KG 115  | Konongo/Rainy | 140,148,175 | 170             | 130,135,145     | 65,75,85 | 100,115     | 215,220     |
| KG 119  | Konongo/Rainy | 150,165,170 | 160,165,172     | 118,130         | 65       | 95          | 200,215,220 |
| KG 039  | Konongo/Rainy | 148,150     | 165             | 135             | 70       | 90,95,120   | 225         |
| KG 015  | Konongo/Rainy | 150,160     | 170,175         | 0               | 65       | 95          | 215,220     |
| KG 099  | Konongo/Rainy | 150         | 170,174         | 122,130         | 65,70    | 80,90,95    | 220         |
| KG 008  | Konongo/Rainy | 147,150,155 | 0               | 135,140         | 65       | 95,100      | 220         |
| KG 068  | Konongo/Rainy | 150         | 160,170         | 125,130,145     | 65,70    | 85,90,115   | 220         |
| KG 106  | Konongo/Rainy | 140,150     | 160,165,170     | 120,128,135,140 | 65,75,80 | 85,95       | 220         |
| KG 108  | Konongo/Rainy | 147,150     | 175,196         | 122,125,135     | 65,68    | 95          | 0           |
| KG 124  | Konongo/Rainy | 148,150     | 160,196         | 135,140,145,170 | 70       | 90          | 215,220     |
| KG 104  | Konongo/Rainy | 150,152,160 | 172,196         | 125,128,130     | 75,80    | 90,110      | 220,225     |
| KG 033  | Konongo/Rainy | 150,170     | 172,196         | 122,128         | 65,75    | 100,120     | 215,220     |
| KG 088  | Konongo/Rainy | 150,151     | 172,196         | 122,128         | 65       | 95          | 215         |
| KG 054  | Konongo/Rainy | 150,165     | 172,195         | 125,130         | 0        | 0           | 225         |
| KG 115  | Konongo/Rainy | 0           | 172             | 0               | 0        | 0           | 220         |

|         |              |                     |         |             |                |            |         |
|---------|--------------|---------------------|---------|-------------|----------------|------------|---------|
| KD 005  | Konongo/Dry  | 140,152,155         | 0       | 0           | 50,55,60,75    | 85,90      | 220     |
| KD 003  | Konongo/Dry  | 150,170             | 0       | 120         | 60             | 90         | 210     |
| KD 103  | Konongo/Dry  | 150,170,175         | 155,178 | 0           | 60             | 98         | 225     |
| KD 042  | Konongo/Dry  | 155,160             | 175     | 120         | 50,55,60,75,80 | 95         | 220     |
| KD 107  | Konongo/Dry  | 160,165             | 150     | 0           | 0              | 95         | 0       |
| KD 108  | Konongo/Dry  | 155,160             | 175     | 125         | 65             | 90         | 215     |
| KD 106  | Konongo/Dry  | 145,150,170,175     | 160,175 | 125         | 95             |            | 0       |
| KD 51   | Konongo/Dry  | 150                 | 175     | 0           | 60             | 95         | 215     |
| KD 080  | Konongo/Dry  | 150,160             | 0       | 0           | 0              | 0          | 0       |
| KD 111  | Konongo/Dry  | 145,150,155,160     | 160     | 120         | 0              | 95         | 0       |
| KD 013  | Konongo/Dry  | 150,155,165         | 175     | 125         | 60             | 90         | 210     |
| KD 001  | Konongo/Dry  | 150                 | 160     | 120         | 70             | 90,95      | 0       |
| KD 009  | Konongo/Dry  | 150,160,165         | 0       | 125         | 50             | 95,100     | 0       |
| KD 015  | Konongo/Dry  | 150                 | 0       | 125         | 60             | 100        | 0       |
| KD 0711 | Konongo/Dry  | 150,155             | 0       | 155         | 65             | 90,95      | 215,225 |
| KD 068  | Konongo/Dry  | 150,155,170         | 0       | 125         | 60             | 95         | 0       |
| KD 109  | Konongo/Dry  | 155,160             | 0       | 120         | 0              | 95         | 0       |
| KD 015  | Konongo/Dry  | 150,155,160,165     | 0       | 125         | 60             | 95         | 220     |
| KD 054  | Konongo/Dry  | 0                   | 190     | 130         | 60,65          | 100        | 210     |
| KD 179  | Konongo/Dry  | 130,145,150,155     | 0       | 120         | 60             | 95         | 220     |
| KD 033  | Konongo/Dry  | 160                 | 0       | 120         | 60             | 95         | 225     |
| KD 088  | Konongo/Dry  | 150,160             | 0       | 0           | 0              | 95         | 220     |
| PZ 096  | Tamale/Rainy | 150                 | 140     | 120         | 0              | 0          | 200     |
| PZ 024  | Tamale/Rainy | 130                 | 170     | 110,118     | 68             | 82         | 175     |
| PZ 034  | Tamale/Rainy | 140,145,155,160,164 | 165     | 120,130,133 | 60             | 70         | 175     |
| PZ 090  | Tamale/Rainy | 150,155             | 168     | 120         | 62             | 90         | 175     |
| PZ 051  | Tamale/Rainy | 170                 | 160     | 118         | 65             | 90         | 175     |
| PZ 194  | Tamale/Rainy | 130,135             | 163     | 122         | 65             | 105        | 170     |
| PZ 100  | Tamale/Rainy | 0                   | 180     | 130         | 60             | 90         | 165     |
| PZ 013  | Tamale/Rainy | 164                 | 0       | 115         | 65             | 90         | 165     |
| PZ 055  | Tamale/Rainy | 170,151             | 170,181 | 122,125     | 60,65,75       | 90,95,100  | 0       |
| PZ 085  | Tamale/Rainy | 151,155,160         | 170,172 | 122,130     | 70,75          | 95,100,125 | 215     |

|         |              |                     |         |             |          |             |         |
|---------|--------------|---------------------|---------|-------------|----------|-------------|---------|
| PZ 093  | Tamale/Rainy | 151                 | 170,172 | 122         | 65       | 90,95       | 215,225 |
| PZ 019  | Tamale/Rainy | 145,151,158         | 170     | 122,125     | 65       | 95          | 215,220 |
| PZ 170  | Tamale/Rainy | 150,155             | 170,175 | 122,130,140 | 0        | 95,100      | 215,220 |
| PZ 194  | Tamale/Rainy | 125,150             | 152,170 | 122,160     | 0        | 90,95       | 215     |
| PZ 047  | Tamale/Rainy | 150,175             | 151,170 | 122         | 0        | 90,100      | 215,225 |
| PZ 043  | Tamale/Rainy | 150,170             | 160,175 | 120,125,130 | 60       | 100         |         |
| PZ 104  | Tamale/Rainy | 140,145,152,155,160 | 165,170 | 115,125     | 60,65    | 90,115      |         |
| PZ 054  | Tamale/Rainy | 145,155             | 0       | 115,120,130 | 60,65,70 | 90,100      | 0       |
| PZ113   | Tamale/Rainy | 140,145             | 170,175 | 112,118     | 60       | 100,115,120 | 210,220 |
| PZ 004  | Tamale/Rainy | 145,160,170         | 170,172 | 122         | 65,75    | 100         | 215,220 |
| PZ 028  | Tamale/Rainy | 145,151,165         | 170     | 125,130     | 75       | 90,100      | 215,225 |
| PZ 160  | Tamale/Rainy | 150,160,165,170     | 170,175 | 120,130     | 65,70    | 90,95       | 220,225 |
| PZ 187  | Tamale/Rainy | 150,170             | 170,175 | 122,130     | 65       | 90,95       |         |
| PZ 178  | Tamale/Rainy | 145,160             | 170,195 | 122,130     | 60,65,70 | 90,100      | 210,215 |
| PZ 078  | Tamale/Rainy | 151,170             | 170,196 | 122         | 60       | 90,115      | 0       |
| PZ 155  | Tamale/Rainy | 140,170             | 170     | 118,122     | 75       | 90,110      | 210,225 |
| PZ 048  | Tamale/Rainy | 151,170             | 151,170 | 122,130     | 0        | 80,90,95    | 210,225 |
| PAG 027 | Tamale/Dry   | 150                 | 0       | 120         | 65       | 85,90       | 0       |
| PAG 087 | Tamale/Dry   | 150                 | 0       | 120         | 65       | 85          | 210     |
| PAG 014 | Tamale/Dry   | 148                 | 0       | 120         | 65       | 80,85,90    | 210     |
| PAG 057 | Tamale/Dry   | 150,165             | 170     | 135         | 60       | 85          | 175     |
| PAG 050 | Tamale/Dry   | 152                 | 160,180 | 120         | 65       | 90          | 175     |
| PAG 048 | Tamale/Dry   | 150,165             | 0       | 130         | 0        | 90          | 0       |
| PAG 051 | Tamale/Dry   | 145,155             | 170     | 120         | 60       | 85          | 0       |
| PAG 020 | Tamale/Dry   | 140                 | 170     | 120         | 65       | 85          | 175     |
| PAG 043 | Tamale/Dry   | 150                 | 165     | 130         | 60       | 80          | 165     |
| PAG 026 | Tamale/Dry   | 150                 | 170     | 120,135     | 65       | 85          | 0       |

S3. Results of the Bayesian inference for the 119 samples collected from the three zones

| # of cluster       | 1       | 2       | 3       | 4       | 5       |
|--------------------|---------|---------|---------|---------|---------|
|                    | -2500.9 | -2317.2 | -2270.8 | -2201.8 | -2197.7 |
|                    | -2501.5 | -2317.6 | -2267.7 | -2201.9 | -2201.5 |
|                    | -2500.5 | -2317.4 | -2270.3 | -2201.1 | -2200.8 |
|                    | -2501.3 | -2317.3 | -2267.2 | -2202.3 | -2202.9 |
|                    | -2501   | -2317.6 | -2270.1 | -2200.8 | -2199.2 |
|                    | -2501.1 | -2317.6 | -2266   | -2202   | -2213.7 |
|                    | -2501.3 | -2317.3 | -2272   | -2201.1 | -2203   |
|                    | -2501   | -2317.7 | -2268.8 | -2200.7 | -2195.5 |
|                    | -2501.3 | -2317.1 | -2283.6 | -2202.8 | -2190.4 |
|                    | -2501.4 | -2317.6 | -2267.9 | -2203.9 | -2189.5 |
| mean               | -2501.1 | -2317.4 | -2270.4 | -2201.8 | -2199.4 |
| standard deviation | 0.295   | 0.207   | 4.975   | 0.994   | 6.938   |

K-Plot

|            |   |         |       |        |       |
|------------|---|---------|-------|--------|-------|
| mean       |   | 183.7   | 47.0  | 68.6   | 2.4   |
| L'(K)      |   | 183.7   | 47.0  | 68.6   | 2.4   |
| L''(K)     |   | 136.7   | 21.6  | 66.2   | 2.4   |
| $\Delta K$ | 0 | 661.748 | 4.342 | 66.611 | 0.349 |

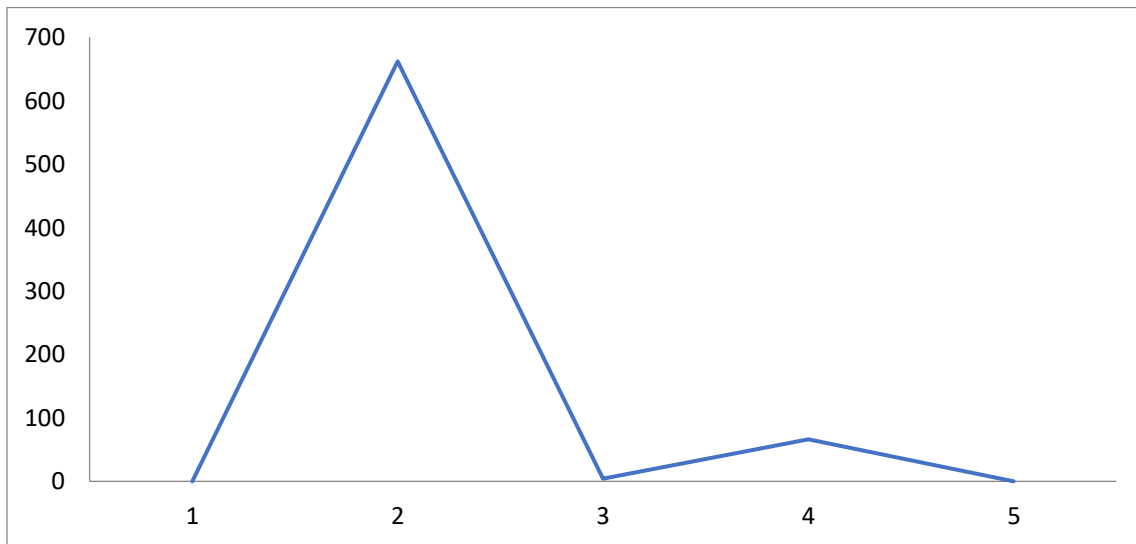

Supplement: 12879_2021_6120_MOESM1_ESM.pdf [file 12879_2021_6120_MOESM1_ESM.pdf]
